# Supplementary material for: Developmental changes in the transcriptome of the rat choroid plexus in relation to neuroprotection
Source: PubMed Central journal article supplement (PMC3737068; doi:10.1186/2045-8118-10-25), 2013-08-01
Supplement: 2045-8118-10-25-S1.pdf [file 2045-8118-10-25-S1.pdf]

**Additional file 1(PDF)**

**List of primers, amplicon sizes and MgCl<sub>2</sub>-concentrations used for qRTPCR**

| Gene name               | Forward primer 5'→ 3'   | Reverse primer 5'→ 3'  | size (bp) | MgCl <sub>2</sub> |
|-------------------------|-------------------------|------------------------|-----------|-------------------|
| AraB ( <i>E. coli</i> ) | atcccctgatcggtaaagca    | acgcctgaaggggtgatta    | 126       | 4 mM              |
| Cldn1                   | gctaagctgctaaccctgtgg t | tctggcaagtctagcagtttg  | 202       | 3 mM              |
| Cldn 3                  | actaccaaccctgatgtacc    | ccattcgactggacagttcct  | 188       | 3 mM              |
| Cldn 5                  | tacatgctaaccctgaaggcca  | aggaggaaggcaaccctctaa  | 196       | 4 mM              |
| Cldn11                  | tgaaggaactgaaccaagcaga  | aaacagcactgctcaagatcg  | 208       | 3mM               |
| Cldn 12                 | tttaagtgtccagattgggca   | aggtgtctgacacactggctc  | 181       | 4mM               |
| Cldn 19                 | caagaccccgcccacactg     | agcaccgtgcgctgagatcc   | 195       | 3mM               |
| Occludin                | gactgggtcagggaaatccacc  | agcagcagccatgtactttcac | 192       | 3mM               |
| Tjp1                    | ttcttgcaaagtatccctctg   | ccacaaaagaaatcctttcaca | 165       | 4mM               |
| Tjp2                    | ctgaatgcatgaggatcttga   | ccacaaagtgcagggcttgaga | 188       | 4mM               |
| Tjp3                    | gggaacagcacacggccacac   | cggcctccaggtaccacgtc   | 122       | 4mM               |
| Abcc4                   | ttccccttcgacctatcct     | taggcagctgtgtcagtg     | 124       | 4mM               |
| Abcg2                   | accacagcggaggcaagt      | gcaggtgaggtgccccgttt   | 105       | 3mM               |
| Sco1a4                  | ctcatattcagggggcttca    | cggtggcaaacagtctttc    | 148       | 3mM               |
| Slco1a5                 | ttctactgcctgtgcaaga     | agcagcatgaaacgacacac   | 147       | 3mM               |
| Slco1c1                 | tgtcttgctgctgtcaatc     | atcatgctgaccagttcc     | 111       | 4mM               |
| Slc22a17                | aatgactctcacgggattg     | gcagcaaggagggtactgag   | 138       | 3mM               |
| Slc22a8                 | ggcccttaccggagactatc    | tctcagcgggattatttg     | 108       | 4mM               |
| Ephx1                   | gctgtgctctgaatgactct    | ctctccagcctccatcc      | 109       | 3mM               |
